# Supplementary material for: CD49b inhibits osteogenic differentiation and plays an important role in osteosarcoma progression
Source: PubMed Central journal article supplement (PMC5675677; doi:10.18632/oncotarget.21254), 2017-09-23
Supplement: oncotarget-08-87848-s001.pdf [file oncotarget-08-87848-s001.pdf]

## CD49b inhibits osteogenic differentiation and plays an important role in osteosarcoma progression

### SUPPLEMENTARY MATERIALS

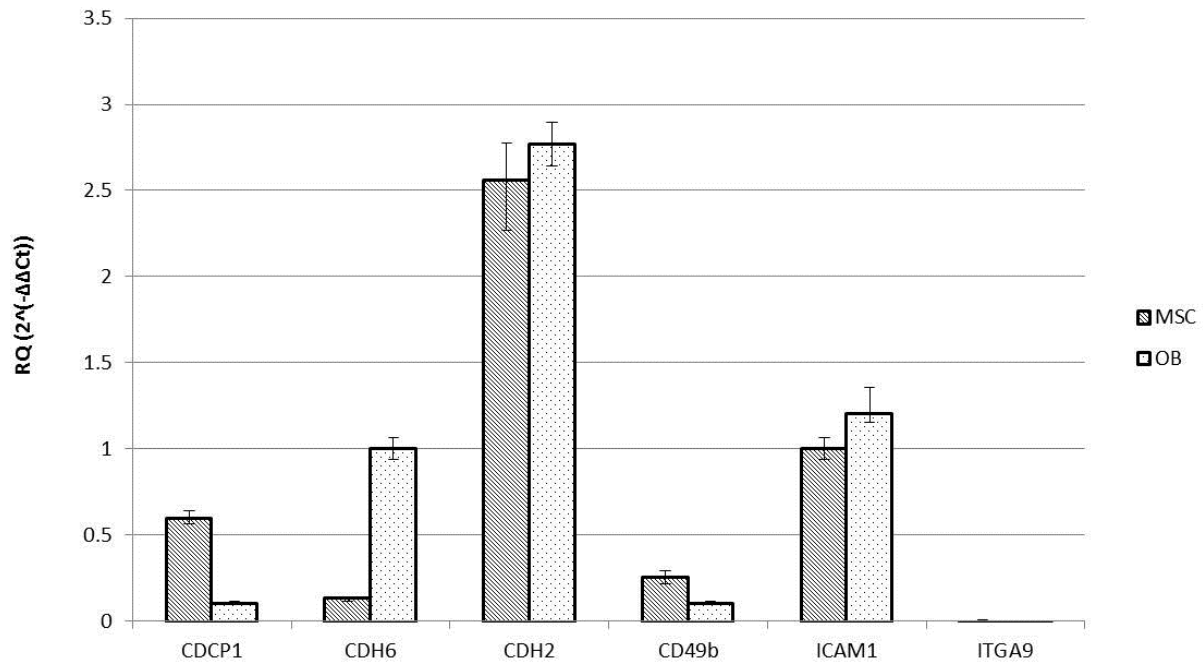

Supplementary Figure 1: Differential expression of six candidate genes were validated by quantitative real-time PCR, using GAPDH as endogenous control.

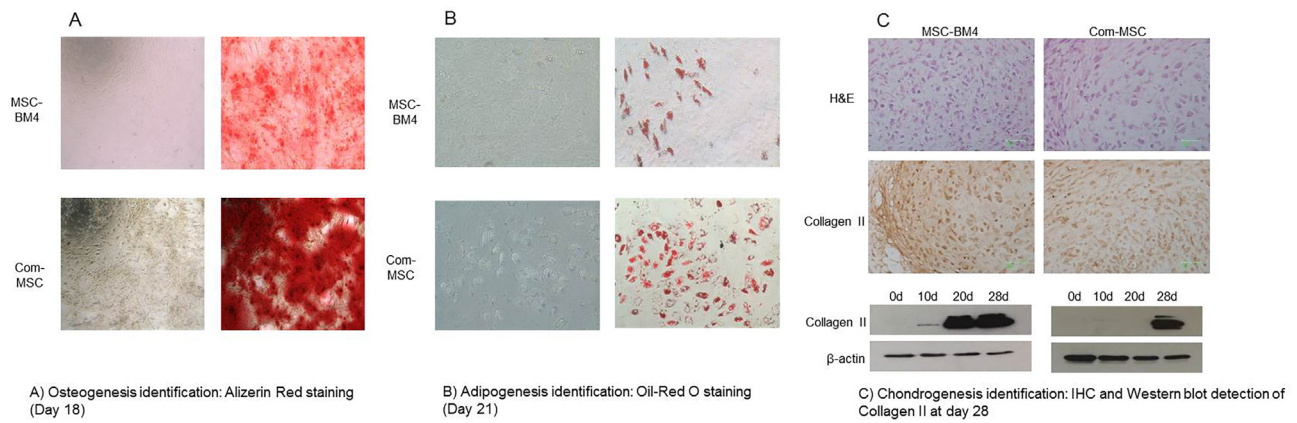

**Supplementary Figure 2:** Multilineage differentiation capacity of MSCs were confirmed by **(A)** Alizarin red staining (day 18): Osteogenesis identification, **(B)** Oil-red O staining (day 21): Adipogenesis identification, and **(C)** IHC and western blot detection of collagen II at day 28: Chondrogenesis identification.

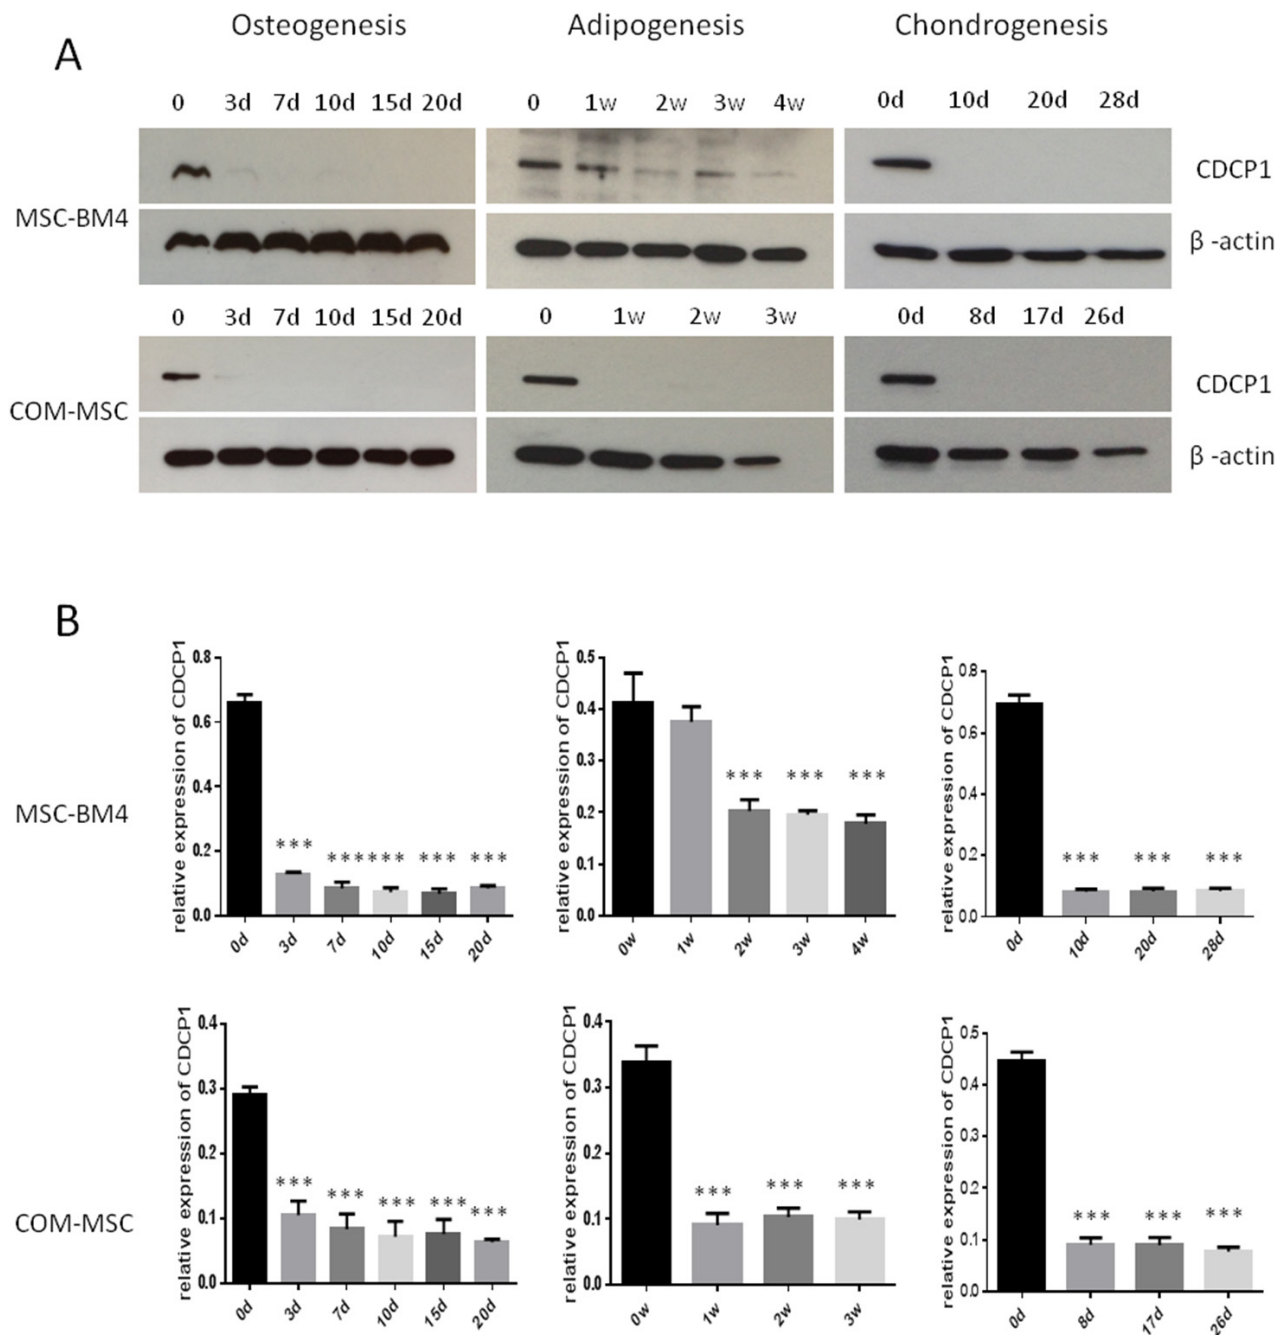

Supplementary Figure 3: Expression of CDCP1 during the differentiation of MSCs into osteoblasts, adipocytes, and chondrocytes. (A) western blot analysis, (B) densitometric analysis. \*\*\*\* indicates significant p-values.

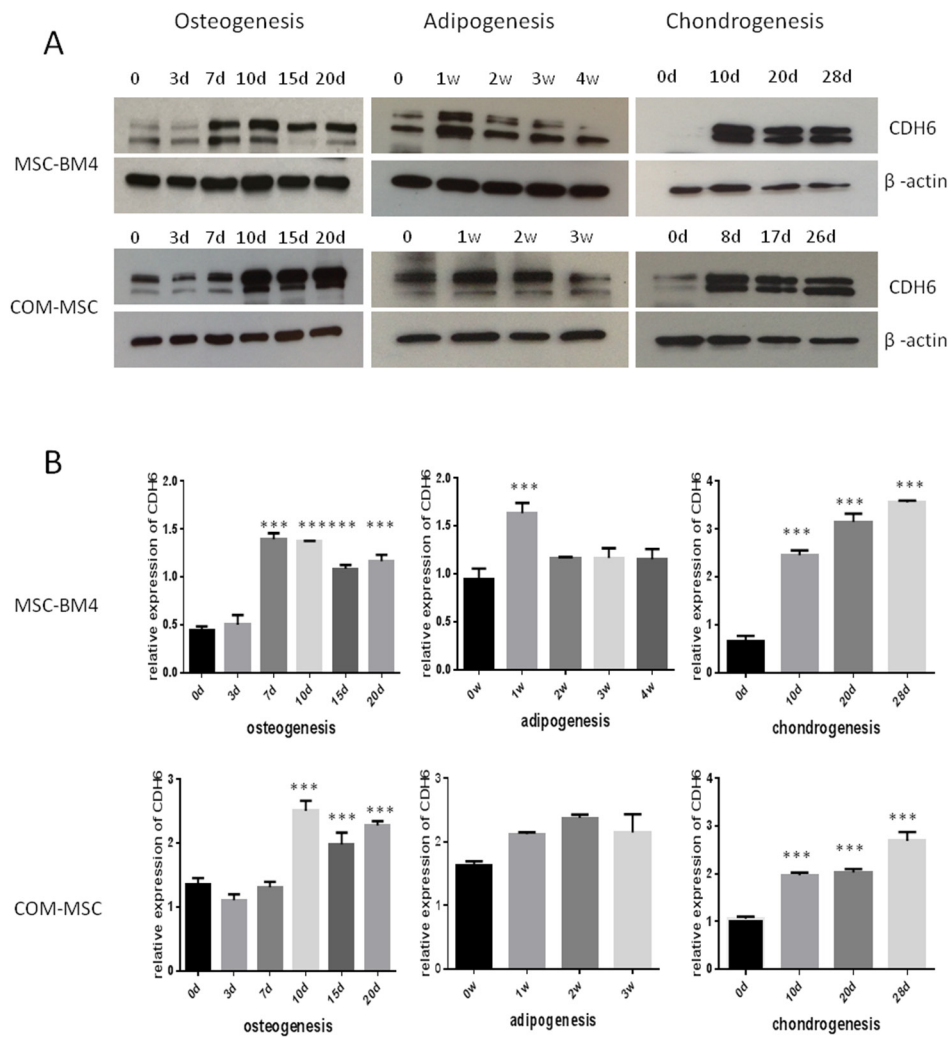

**Supplementary Figure 4: Expression of CDH6 during the differentiation of MSCs into osteoblasts, adipocytes, and chondrocytes. (A) western blot analysis, (B) densitometric analysis. \*\*\* indicates significant p-values.**

# Cell Proliferation results

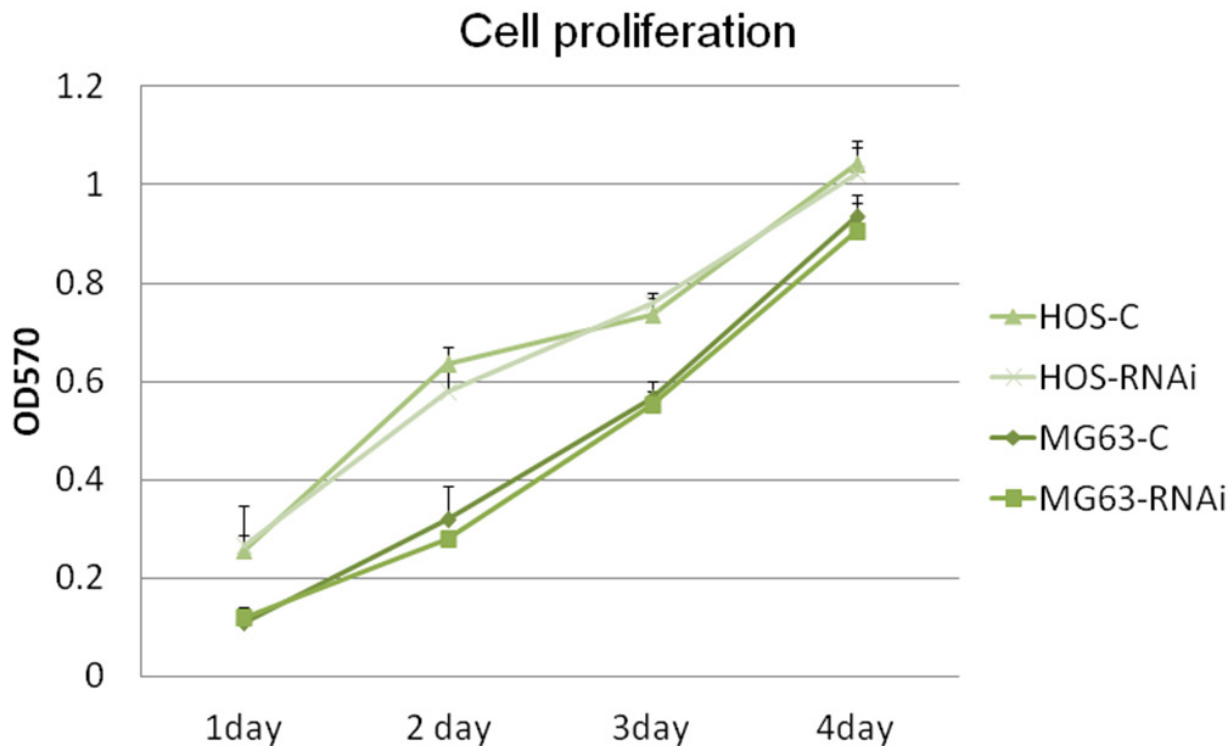

Supplementary Figure 5: Cell proliferation was examined by MTT assay. No significant difference in cell proliferation was seen in osteosarcoma cells with decreased CD49b expression.

Supplementary Table 1: Microarray - MSC and OB

| genename                                                         | symbol       | P.Value  |
|------------------------------------------------------------------|--------------|----------|
| Endoglin                                                         | CD105        | 0.005061 |
| CUB domain containing protein 1                                  | CDCP1        | 0.005073 |
| cadherin 6, type 2, K-cadherin                                   | CDH6         | 0.005315 |
| prostate stem cell antigen                                       | PSCA         | 0.006426 |
| frizzled homolog 3                                               | FZD3         | 0.00767  |
| epidermal growth factor receptor                                 | EGFR         | 0.009175 |
| cadherin 2, type 1, N-cadherin (CD325)                           | CDH2/CD325   | 0.014005 |
| CD72 molecule                                                    | CD72         | 0.019666 |
| integrin, alpha 2 (CD49b)                                        | ITGA2/CD49b  | 0.020014 |
| CD200 molecule                                                   | CD200        | 0.022439 |
| chemokine (C-X-C motif) ligand 16                                | CXCL16       | 0.022514 |
| CD6 molecule                                                     | CD6          | 0.023729 |
| colony stimulating factor 2 receptor, beta, low-affinity (CD131) | CSF2RB/CD131 | 0.024141 |
| Rh blood group, D antigen                                        | RHD          | 0.025365 |
| tumor necrosis factor receptor superfamily, member 10d           | TNFRSF10D    | 0.030534 |
| CD1c molecule                                                    | CD1c         | 0.036153 |
| CD8a molecule                                                    | CD8a         | 0.04123  |
| coagulation factor II receptor-like 1                            | F2RL1        | 0.041743 |
| intercellular adhesion molecule 1 (CD54)                         | ICAM1/CD54   | 0.041873 |
| integrin, alpha 9                                                | ITGA9        | 0.042456 |
| CD177 molecule                                                   | CD177        | 0.045178 |
| syndecan 1 (CD138)                                               | SDC1/CD138   | 0.04839  |
| dipeptidyl-peptidase 4 (CD26)                                    | DPP4/CD26    | 0.048982 |
| chemokine (C-C motif) receptor 9                                 | CCR9         | 0.04952  |

Supplementary Table 2: Frequency of CD49b measured

| Tissue       | 0            | 1+           | 2+           | 3+         | Negative     | Positive     |
|--------------|--------------|--------------|--------------|------------|--------------|--------------|
|              | n (%)        | n (%)        | n (%)        | n (%)      | n (%)        | n (%)        |
| Osteosarcoma | 22<br>(38.6) | 22<br>(38.6) | 11<br>(19.3) | 2<br>(3.5) | 22<br>(38.6) | 35<br>(61.4) |
